# Supplementary material for: Opposite-sex attraction in male mice requires testosterone-dependent regulation of adult olfactory bulb neurogenesis
Source: PubMed Central journal article supplement (PMC5080553; doi:10.1038/srep36063), 2016-10-26
Supplement: srep36063-s1.pdf [file srep36063-s1.pdf]

## Supplementary Figures

### **Opposite-sex attraction in male mice requires testosterone-dependent regulation of adult olfactory bulb neurogenesis**

Roberta Schellino<sup>1,2</sup>, Sara Trova<sup>1,2</sup>, Irene Cimino<sup>5</sup>, Alice Farinetti<sup>4</sup>, Bart C. Jongbloets, R. Jeroen Pasterkamp<sup>7</sup>, Giancarlo Panzica<sup>2,3,4</sup>, Paolo Giacobini<sup>5,6</sup>, Silvia De Marchis<sup>§1,2,3</sup> and Paolo Peretto\*<sup>§1,2,3</sup>

<sup>1</sup>Department of Life Sciences and Systems Biology, University of Turin, Turin I-10123, Italy

<sup>2</sup>NICO – Neuroscience Institute Cavalieri Ottolenghi, University of Turin, Turin I-10125, Italy

<sup>3</sup>Neuroscience Institute of Turin (NIT), University of Turin, Turin I-10125, Italy

<sup>4</sup>Department of Neuroscience, University of Turin, Turin I-10125, Italy

<sup>5</sup>Inserm, UMR-S 1172, Laboratory of Development and Plasticity of the Neuroendocrine Brain, F-59000 Lille, France

<sup>6</sup>Univ. Lille, UMR-S 1172 - JPArc - Centre de Recherche Jean-Pierre AUBERT Neurosciences et Cancer, F-59000 Lille, France

<sup>7</sup>Department of Translational Neuroscience, Brain Center Rudolf Magnus, University Medical Center Utrecht, 3584 CG11 Utrecht, The Netherlands.

§These authors jointly supervised this work.

Running title: AOB neurogenesis and opposite-sex attraction

Keywords: adult neurogenesis, AOB, testosterone, sexual dimorphism, sexual attraction, reproduction

\*Corresponding author:

Paolo Peretto, PhD,

Associate Professor, University of Turin

Dept. Life Sciences and Systems Biology (DBIOS),

Via Accademia Albertina, 13 - 10123 Torino -IT

Neuroscience Institute Cavalieri Ottolenghi (NICO)

Regione Gonzole, 10 - 10043 Orbassano (To) - IT

tel. +39-011670-4673/ -6605

email: [paolo.peretto@unito.it](mailto:paolo.peretto@unito.it)

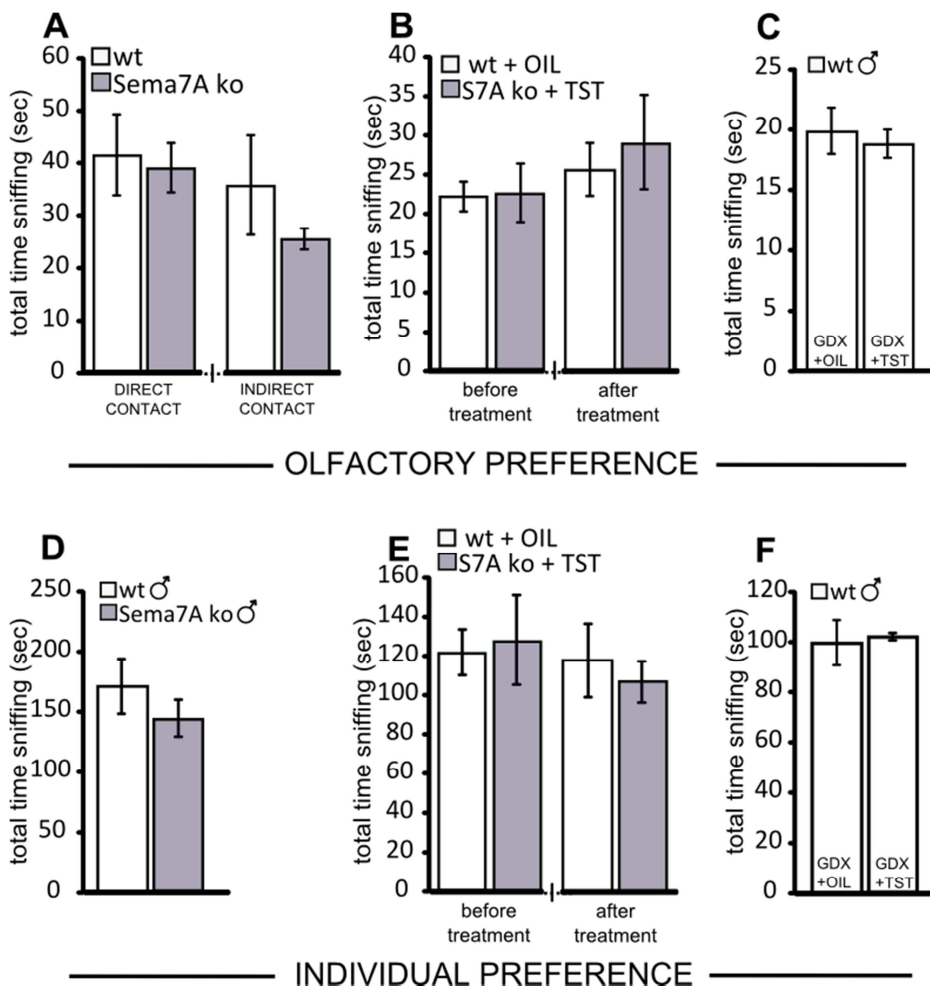

**Supp. Figure 1: Total time of sniffing in olfactory and individual preference tests in wt and *Sema7A* ko males.** The total amount of time (sniffing period) was evaluated by considering the whole time spent by each animal sniffing/interacting with scents /individuals of both sexes (male plus female odors/individuals). No significant differences ( $P > 0.05$ ) are evident in the olfactory preference test between *Sema7A* ko and wt males in all the considered conditions: (A) direct and indirect contact with the pheromonal source in intact males (wt and *Sema7A* ko animals); (B) before and after treatment with oil (wt) and testosterone (TST, *Sema7A* ko); (C) in oil- and TST-treated wt gonadectomized (GDX) males ( $n = 8$  each group; Unpaired Student's t-test,  $P > 0.05$ ). (D-F) No significant differences ( $P > 0.05$ ) between the above-indicated groups are also visible when the total time of sniffing was referred to the social interaction assay ( $n = 8$  each group; Unpaired Student's t-test,  $P > 0.05$ ). The values shown are the mean  $\pm$  s.e.m.

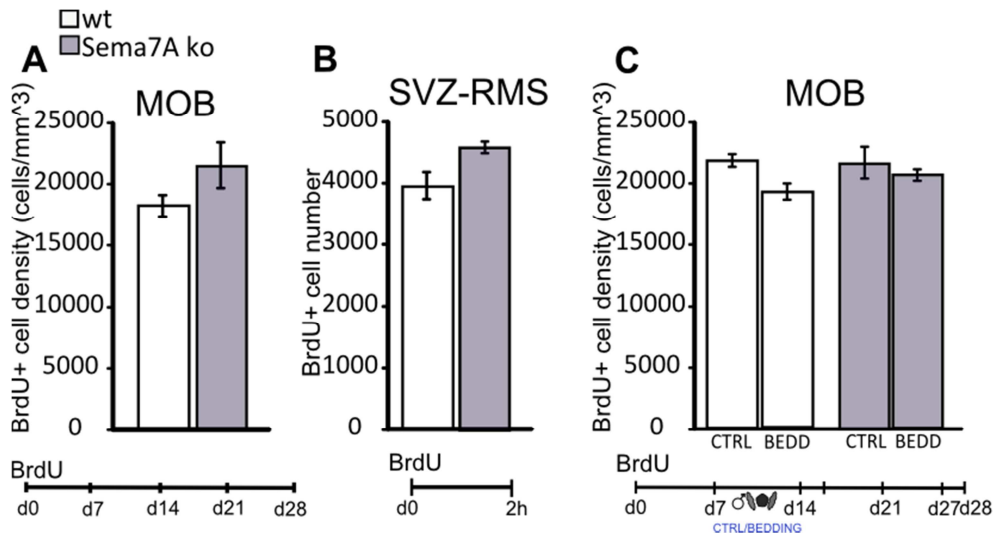

**Suppl. Figure 2: Adult neurogenesis in the MOB and SVZ-RMS of Sema7A ko and wt males.**

(A, B) Clean bedding condition, (C) Male-bedding exposure. A) Newborn cell survival evaluated 4 weeks after BrdU injection in the MOB GrL shows no significant difference between wt and Sema7A ko males in the density of BrdU+ cells (n=4 each group; Unpaired Student's t-test;  $P > 0.05$ ). (B) No significant difference in the density of BrdU+ neurons is evident between Sema7A ko (n=4) and wt (n=5) males two hours after a single BrdU pulse (unpaired Student's t-test,  $P > 0.05$ ). (C) Cell survival in the MOB after 1 week-exposure/familiarization to male bedding/pheromones. After 28 days from BrdU injection, no significant differences are evident in newborn neurons cell density between control and male-bedding familiarized groups, in both wt and Sema7A ko males (n=4 each group; One-way Anova;  $P > 0.05$ ). Abbreviations: MOB: main olfactory bulb; SVZ-RMS: subventricular zone-rostral migratory stream; CTRL: control group; BEDD: bedding group; S7A: Sema7A; BrdU: bromodeoxyuridine. The values shown are the mean  $\pm$  s.e.m.

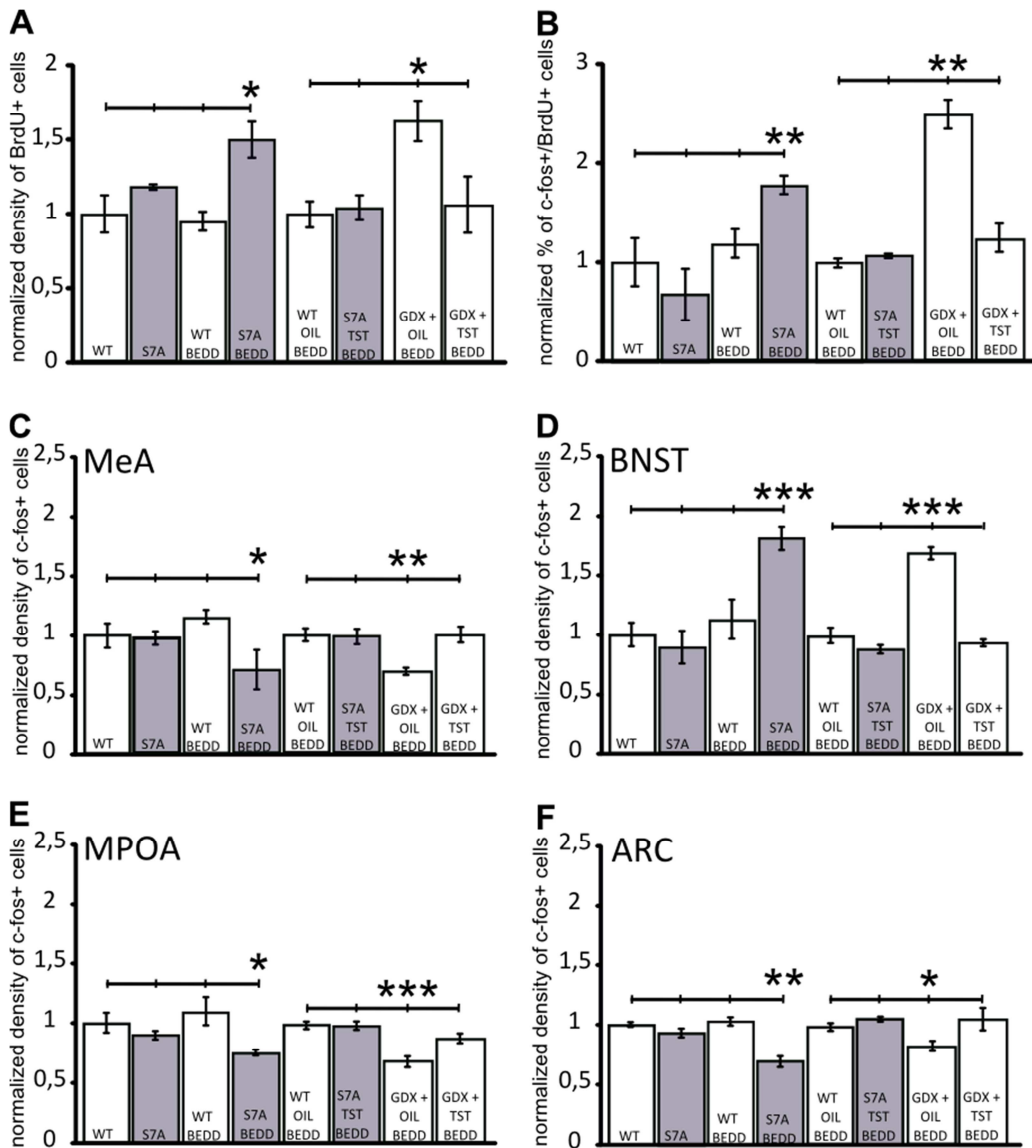

**Suppl. Figure 3: Direct comparison of BrdU cell density and c-fos expression along the vomeronasal pathway in *Sema7* ko and wt oil- and TST-treated male mice, in the clean bedding condition and after male bedding exposure.** The data, coming from different experiments, have been normalized to wt intact/oil-treated animals (=1). Both the BrdU cell density in the accessory olfactory bulb (AOB) (A) and the c-fos expression in AOB newborn neurons (B) and in cells of other vomeronasal nuclei (C-F) clearly show similar patterns for the *Sema7A* ko intact males and wt gonadectomised (GDX) oil-treated males, after male bedding exposure. Similarly, same patterns are also visible between *Sema7A* TST-treated mice and wt oil-treated or wt GDX-TST-treated males. (A) One-way Anova, \* $P < 0.05$ ; (B) Kruskal-Wallis Test, \*\* $P < 0.01$ ; (C-F)

One-way Anova,\*P<0.05, \*\*P<0.01, \*\*\*P<0.001. Abbreviations: GDX: gonadectomy; TST: testosterone; BEDD: bedding; MeA: medial amygdala; BNST: bed nucleus of stria terminalis; MPOA: medial preoptic area; Arc: arcuate nucleus; BrdU: bromodeoxyuridine. The values shown are normalized mean $\pm$ s.e.m.
